# Supplementary material
Source: PubMed Central journal article supplement (PMC2795404)
Supplement: NIHMS155188-supplement-Supplement.pdf [file NIHMS155188-supplement-Supplement.pdf]

## SUPPORTING INFORMATION

**Section I. Distances between salinixanthin (*I*) and side chain atoms of residues within 4 Å in xanthorhodopsin based on the 3DLL coordinate set (2). Homologous residues in gloeobacter rhodopsin and bacteriorhodopsin are shown in the right column (residues identical to xanthorhodopsin are in bold).**

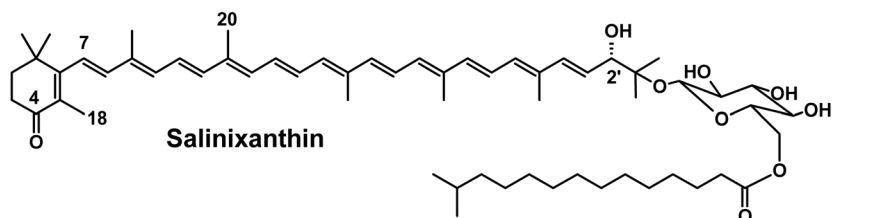

| Distance (Å) | Residue in XR  | Carotenoid part     | Residue in GR / BR            |
|--------------|----------------|---------------------|-------------------------------|
| 2.58         | Arg184, NH1    | Glycoside, O3*      | Ala206 / Glu166               |
| 3.08         | Asn191, ND2    | Glycoside, O1*      | <b>Asn213</b> / Val173        |
| 3.11         | Thr160, OG1    | Chain, C7           | <b>Thr182</b> / <b>Thr142</b> |
| 3.18         | Met211, CE     | Keto group, O21     | <b>Met233</b> / S193          |
| 3.25         | Tyr207, CE2    | Keto group, O21     | <b>Tyr229</b> / Trp189        |
| 3.29         | Leu194, CD2    | Chain, C8'          | Trp216 / Asp176               |
| 3.54         | Leu148, CD2    | Ring, C3            | Asp170 / Val130               |
| 3.56         | Gly156, CA     | Keto group, O21     | <b>Gly178</b> / W138          |
| 3.64         | Met208, SD     | Ring, C18           | Leu230 / Leu190               |
| 3.73         | Pro204, CB, CG | Chain, C9, C10, C11 | <b>Pro226</b> / <b>Pro186</b> |
| 3.73         | Gly201, CA     | Chain, C13          | <b>Gly223</b> / Ser183        |
| 3.76         | Phe163, CE2    | Chain, C20          | <b>Phe185</b> / Met154        |
| 3.77         | Leu188, CD2    | Glycoside, O3*      | <b>Leu210</b> / Thr170        |
| 3.95         | Ile205, CD     | Chain, C14          | <b>Ile227</b> / Val187        |
| 3.97         | Ala198, CB     | Chain, C12'         | Leu220 / Val180               |
| 4.09         | Leu197, CD1    | Chain, C20          | <b>Leu219</b> / Val179        |

## **Section II. Xanthorhodopsin clade: genes of retinal proteins with high homology to xanthorhodopsin.**

The xanthorhodopsin sequence (3, 4) contains 20.5% residues identical to those in bacteriorhodopsin (3) and 26.1% residues, identical with those in green light absorbing proteorhodopsin (2). There are organisms that carry retinal-protein genes with substantially higher homology, forming a clade with xanthorhodopsin (4-6). These are genes in *Gloeobacter violaceus*, *Pyrocystis lunula*, numerous members of Actinobacteria, Proteobacteria and other species (see below and ref. (5)). Most of the sequences suggest that these proteins can bind retinal and act as light-driven proton pumps since they contain homologues of the key residues in proton transport, Asp96 serving as the proton acceptor from the Schiff base and Glu108 as the internal proton donor (numbers from xanthorhodopsin sequence). An interesting exception is the retinal protein of *Fulvimarina pelagi*, in which these residues are replaced with asparagine and glutamine, respectively. These replacements suggest that it is a sensor rather than a proton pump. As in xanthorhodopsin and the proteorhodopsins, most of these sequences contain a histidine homologous to His62 in xanthorhodopsin which makes a strong hydrogen bond with Asp96 in xanthorhodopsin.

Some sequences (like the highly homologous protein from *Methylophilales bacterium* HTCC2181 (6)) contain tryptophan in the retinal ring binding site (homologous to Trp138 in bacteriorhodopsin), however in a large number of sequences it is replaced with the smaller glycine as in xanthorhodopsin of *S. ruber*, which makes these proteins potential candidates for binding of carotenoid antenna with a ring similar to that in salinixanthin.

Below, we present incomplete list of these organisms and their retinal protein sequence accession number followed by corresponding sequences of the E and F helix obtained from NCBI using BLASTP. Marked with red are residues that interact with carotenoid in xanthorhodopsin and conserved in other proteins. To the right the percentages of identities to xanthorhodopsin are shown, as well as the four residues homologous to His56, Asp96, Glu108 and G178 of xanthorhodopsin. The sequence of bacteriorhodopsin, BR, (7, 8) from *Halobacterium salinarum* is given for comparison.

|                                                                       |      |         |
|-----------------------------------------------------------------------|------|---------|
| 1) <i>Salinibacter ruber</i> DSM 13855 ( <u>YP 445623</u> )           | 100% | H D E G |
| 2) <i>Gloeobacter violaceus</i> PCC 7421 ( <u>NP 923144</u> )         | 53%  | H D E G |
| 3) <i>Thermus aquaticus</i> Y51MC23 ctg62 ( <u>ZP 03495873</u> )      | 53%  | H D E G |
| 4) <i>Roseiflexus</i> sp. RS-1 ( <u>YP 001277280</u> )                | 52%  | H D E G |
| 5) <i>Methylophilales bacterium</i> HTCC2181 ( <u>ZP 01551538</u> )   | 49%  | H D E W |
| 6) <i>Alpha proteobacterium</i> BAL199 ( <u>EDP63929</u> )            | 48%  | H D E G |
| 7) <i>Octadecabacter antarcticus</i> 238 ( <u>ZP 05063020</u> )       | 47%  | H D E G |
| 8) <i>Actinobacterium</i> MWH-EgelM2-3.D6 ( <u>ACN42852</u> )         | 46%  | H D E G |
| 9) <i>Fulvimarina pelagi</i> HTCC2506 ( <u>ZP 01440547</u> )          | 34%  | S N Q G |
| 10) <i>Geodermatophilus odscurus</i> DSM 43160 ( <u>ZP 03889903</u> ) | 32%  | A D E G |
| 11) <i>Kineococcus radiotolerans</i> SRS30216 ( <u>EAM73404</u> )     | 32%  | S D E G |
| 12) <i>Exiguobacterium</i> sp. AT1b ( <u>YP 002885111</u> )           | 31%  | H D K G |
| 13) <i>Polaribacter</i> sp. MED152 ( <u>ZP 05108337</u> )             | 32%  | H D E G |
| 14) <i>Dokdonia donghaensis</i> MED134 ( <u>EAQ40507</u> )            | 31%  | H D E G |
| 15) <i>Polaribacter irgensii</i> 23-P ( <u>ZP 01117885</u> )          | 31%  | H D E G |
| 16) <i>Flavobacteria bacterium</i> BAL38 ( <u>ZP 01734914</u> )       | 29%  | H D E G |
| 17) <i>Psychroflexus torquis</i> ATCC 700755 ( <u>ZP 01253360</u> )   | 29%  | H D E G |

BR YRFVWVAIS**T**AAMLYILYVLF**F**FGFTSKAE--SMRPEVASTFKVLRNVT**V**VLWSAY**P**VVWLIGS

1) TRGLW**G**FLS**T**IP**F**VWILYILFT**Q**LGDTIQ--RQSS**R**VST**L**LG**N**AR**L**LL**L**ATW**G**FY**P**IAY**M**IP**M**

2) **T**RIIW**G**TVS**T**IP**F**AYILYVLWVELSRSLV--RQPAAV**Q**T**L**VR**N**MRW**L**LL**S**W**G**VY**P**IAY**L**LP**M**

3) PRTLW**G**ALS**S**V**P**FFYILYVLWVELG**Q**AIREAK**F**GP**R**V**L**EL**L**GAT**R**L**V**LL**M**SW**G**FY**P**IAY**A**L**G**T

4) **T**RLVW**G**TL**S**IP**F**LYILYVLWRDLGAVME--RESAEVR**V**LL**R**N**L**R**L**LL**L**ASW**G**VY**P**IAY**L**LP**L**

5) **T**R**M**W**W**ILAMIP**F**LYIVKDLVSGLGASIS--KQPKAV**Q**GL**V**SNART**L**TILSW**T**FFY**P**IV**F**IL**P**M

6) **T**RLIW**G**ALSMIP**F**LYIVMTLYSGLSKSID**Q**--Q**P**ENVR**G**LVSMARSLVVVSWFFY**P**IV**F**FL**P**F

7) VRWIF**G**LLSMIP**F**LWIVF**Q**LYVGLGKAIES--Q**P**ENAR**G**LV**R**TARN**V**T**V**GS**W**CFY**P**V**V**Y----

8) **T**KILW**G**VL**S**TIP**F**LYILYVLFV**E**LGKSLER--Q**P**AGVAAT**V**GR**L**R**W**LL**L**ATW**G**VY**P**IS**Y**LF**P**L

9) **R**LN**V**W**G**VIS**T**IF**F**VWLIIEVRGVISRAI-AMG-PAELA**A**WP**K**NI**W**FF**L**AF**W**GLY**P**IAY**A**LP**Q**

10) **A**L**V**W**G**LIS**T**AF**F**AYLYVALIGAVRRSLPTMG--PEAAV**S**LR**N**ATIV**L**LS**S**FGIY**P**LVYAV**P**V

11) **A**LI**A**W**G**V**V**S**S**AFYAALHV**L**IRVLR**R**SRGAMG--AQAY**T**SYR**N**AT**I**LL**S**V**W**GWY**P**IAY**A**L**Q**V

12) **Q**L**G**LW**G**YLVGCIAWYIYIYLLFT**N**VTKAA**E**T**S**P-PP**I**R**K**ALL**N**M**R**L**F**IL**I**GW**A**IY**P**IG**Y**AV**T**L

13) **Q**AW**F**W**G**LVSGIAYFVIVYDIWLGKAKKLAVA-AGGS**V**LKA**H**KT**L**CW**F**V**L**VGW**A**IY**P**IG**Y**M**A**G-

14) **N**AW**L**W**G**LISGAAYFVIVYDIWLGSAK**K**LAV-RAGG**A**VL**S**A**H**KT**L**CW**F**V**L**VGW**A**IY**P**IG**Y**M**A**G-

15) **N**AQ**I**W**G**LASGIAYFVIVYDIWLG**T**AKKLAVA-AGGE**V**LKA**H**K**A**L**C**W**F**V**L**VGW**A**IY**P**IG**Y**M**A**G-

16) **N**AW**I**W**G**LVSGIAYFAIAYE**I**WLGE**A**SK**L**AK-AAG**G**N**V**LE**A**H**K**IL**C**W**F**V**L**VGW**A**IY**P**L**G**Y**M**L**G**-

17) **F**SW**Q**W**G**LASGIAYFVIVYVWFGE**A**KK**L**AVS-AGGE**V**LKA**H**N**I**L**C**W**F**V**L**VGW**A**IY**P**L**G**Y**I**L**G**-

Some marked residues (T and P) are conserved in bacteriorhodopsin, and hence should not be viewed as specifically involved in carotenoid binding in xanthorhodopsin and other proteins.

### Section III. Alignment of xanthorhodopsin and gloeobacter rhodopsin.

Helical segments in 3DLL structure of xanthorhodopsin (XR) are underlined, helices are labeled by letters A, B, C, D, F and G. Identical residues are labeled with red. Upper numbers correspond to gloeobacter rhodopsin sequence from *G. violaceus* genome (NC\_005125.1) (9), lower numbers, to xanthorhodopsin (3), genome sequence NC\_007677.1 (4) and crystal structure (2). Residues of xanthorhodopsin not resolved in the crystal structure are shown with grey font.

```

GR MLMTVFSSAPELALLGSTFAQVDPSNLSVSDSLT
XR MLQELPT.....LT

      35              64              72              87              97
GR YGFNLVYNAFSFAIAAMFASALFFSAQALVGQRYRLALLVSAIVVSIAGYHYFRIFNSWDAAYVL
XR PGQYSLVFNMFSFTVATMTASFVFFVLARNNVAPKYRISMMVSALVVFIAGYHYFRITSWEAAYAL
      10              A              39              47              B 62              72

              116  121              132              144              167
GR ENGVSLTSEKFNDAYRYVDWLLTVPLLLVETVAVLTLPAKEARPLLIKLTVASVLMIATGYPGEI
XR QNGMYQPTGELFNDAYRYVDWLLTVPLLTVELVLVMGLPKNERGPLAAKLGFLAALMIVLGYPGEV
              91  96              C 107              119              D 142

              173  178              193              205              231
GR SDDIT---TRIIWGTVSTIPFAYILYVLWVELSRSLVRQPAAVQTLVRNMRWLLLLSWGVYPIAYLL
XR SENAALFGTRGLWGFLSTIPFVWILYILFTQLGDTIQRQSSRVSTLLGNARLLLATWGFYPIAYMI
              151  156              E 171              183              F 209

      232              239              274
GR PM-----LGVSGTSAAVGVQVGYTIADVLAKPVFGLLVFAIALVKTKADQESSEPHAAIGAANKSG
XR PMAFPEAFPSNTPGTIVALQVGYTIADVLAKAGYGVLIYNIAKAKSEEEGFNVSEMVEPATASA
      210              222              G 257              273

      298
GR GSLIS
XR

```

## REFERENCES

1. Lutnaes, B. F., Oren, A., and Liaaen-Jensen, S. (2002) New C<sub>40</sub>-carotenoid acyl glycoside as principal carotenoid in *Salinibacter ruber*, an extremely halophilic eubacterium, *J. Nat. Prod.* 65, 1340-134.
2. Luecke, H., Schobert, B., Stagno, J., Imasheva, E. S., Wang, J. M., Balashov, S. P., and Lanyi, J. K. (2008) Crystallographic structure of xanthorhodopsin, the light-driven proton pump with a dual chromophore, *Proc. Natl. Acad. Sci. U.S.A.* 105, 16561-16565.
3. Balashov, S. P., Imasheva, E. S., Boichenko, V. A., Antón, J., Wang, J. M., and Lanyi, J. K. (2005) Xanthorhodopsin: A proton pump with a light-harvesting carotenoid antenna, *Science* 309, 2061-2064.
4. Mongodin, E. F., Nelson, K. E., Daugherty, S., DeBoy, R. T., Wister, J., Khouri, H., Weidman, J., Walsh, D. A., Papke, R. T., Sanchez Perez, G., Sharma, A. K., Nesbø, C. L., MacLeod, D., Baptiste, E., Doolittle, W. F., Charlebois, R. L., Legault, B., and Rodriguez-Valera, F. (2005) The genome of *Salinibacter ruber*: Convergence and gene exchange among hyperhalophilic bacteria and archaea, *Proc. Natl. Acad. Sci. U.S.A.* 102, 18147-18152.
5. Sharma, A. K., Zhaxybayeva, O., Papke, R. T., and Doolittle, W. F. (2008) Actinorhodopsins: proteorhodopsin-like gene sequences found predominantly in non-marine environments, *Environmental Microbiology* 10, 1039-1056.
6. Giovannoni, S. J., Hayakawa, D. H., Tripp, H. J., Stingl, U., Givan, S. A., Cho, J.-C., Oh, H.-M., Kitner, J. B., Vergin, K. L., and Rappé, M. S. (2008) The small genome of an abundant coastal ocean methylotroph, *Environ. Microbiol.* 10, 1771-1782.
7. Ovchinnikov, Y. A., Abdulaev, N. G., Feigina, M. Y., Kiselev, A. V., and Lobanov, N. A. (1979) The structural basis of the functioning of bacteriorhodopsin: An overview, *FEBS Lett.* 100, 219-224.
8. Khorana, H. G., Gerber, G. E., Herlihy, W. C., Gray, C. P., Anderegg, R. J., Nihei, K., and Biemann, K. (1979) Amino acid sequence of bacteriorhodopsin, *Proc. Natl. Acad. Sci. U.S.A.* 76, 5046-5050.
9. Nakamura, Y., Kaneko, T., Sato, S., Mimuro, M., Miyashita, H., Tsuchiya, T., Sasamoto, S., Watanabe, A., Kawashima, K., Kishida, Y., Kiyokawa, C., Kohara, M., Matsumoto, M., Matsuno, A., Nakazaki, N., Shimpō, S., Takeuchi, C., Yamada, M., and Tabata, S. (2003) Complete genome structure of *Gloeobacter violaceus* PCC 7421, a cyanobacterium that lacks thylakoids, *DNA Research* 10, 137-145.
